# Supplementary material for: Effects of Influenza Vaccine on Mortality and Cardiovascular Outcomes in Patients With Cardiovascular Disease: A Systematic Review and Meta‐Analysis
Source: PubMed Central journal article supplement — J Am Heart Assoc. 2021 Mar 13;10(6):e019636. doi: 10.1161/JAHA.120.019636 (PMC8174205; doi:10.1161/jaha.120.019636), 2021-03-13
Supplement: JAH3-10-e019636-s001.pdf [file JAH3-10-e019636-s001.pdf]

**Table S1. Newcastle-Ottawa scale for quality assessment and bias assessment of observational studies.**

| Studies                                    | Selection                        |                            |                        |                     | Comparability | Outcome            |                                |                                 | *Total |
|--------------------------------------------|----------------------------------|----------------------------|------------------------|---------------------|---------------|--------------------|--------------------------------|---------------------------------|--------|
|                                            | Representatives of exposed group | Selection of control group | Exposure ascertainment | Outcome of interest |               | Outcome assessment | Adequacy of follow up duration | Adequacy of follow up of cohort |        |
| De Diego <i>et al.</i> <sup>7</sup>        | 1                                | 1                          | 1                      | 1                   | 1             | 1                  | 1                              | 0                               | 6/8    |
| Liu <i>et al.</i> <sup>30</sup>            | 1                                | 1                          | 1                      | 1                   | 0             | 1                  | 1                              | 1                               | 7/8    |
| Wu <i>et al.</i> <sup>20</sup>             | 1                                | 1                          | 1                      | 1                   | 0             | 1                  | 1                              | 0                               | 6/8    |
| Kopel <i>et al.</i> <sup>31</sup>          | 1                                | 1                          | 1                      | 1                   | 1             | 1                  | 1                              | 0                               | 7/8    |
| Blaya-Novakova <i>et al.</i> <sup>34</sup> | 1                                | 1                          | 1                      | 1                   | 0             | 1                  | 1                              | 0                               | 6/8    |
| Vardeny <i>et al.</i> <sup>10</sup>        | 1                                | 1                          | 1                      | 1                   | 0             | 0                  | 1                              | 1                               | 6/8    |
| Modin <i>et al.</i> <sup>33</sup>          | 1                                | 1                          | 1                      | 1                   | 1             | 0                  | 1                              | 1                               | 7/8    |
| Wu <i>et al.</i> <sup>32</sup>             | 1                                | 1                          | 1                      | 1                   | 0             | 1                  | 1                              | 0                               | 6/8    |
| Kaya <i>et al.</i> <sup>36</sup>           | 1                                | 1                          | 1                      | 1                   | 1             | 0                  | 1                              | 1                               | 7/8    |
| Jackson <i>et al.</i> <sup>35</sup>        | 1                                | 1                          | 1                      | 1                   | 0             | 1                  | 1                              | 0                               | 6/8    |
| Lavallee <i>et al.</i> <sup>21</sup>       | 1                                | 1                          | 1                      | 1                   | 0             | 1                  | 1                              | 0                               | 6/8    |
| Mohseni <i>et al.</i> <sup>37</sup>        | 1                                | 1                          | 1                      | 1                   | 1             | 0                  | 1                              | 1                               | 7/8    |

\*Score >6 was considered as an adequate quality study.

**Table S2. Sensitivity analysis by removal of IVCAD trial.**

| <b>Outcome</b>           | <b>RR [95% Confidence Interval]</b> |
|--------------------------|-------------------------------------|
| All-cause mortality      | 0.48 [0.25, 0.94]                   |
| Cardiovascular mortality | 0.40 [0.23, 0.71]                   |
| MACE                     | 0.56 [0.42, 0.73]                   |
| Myocardial infarction    | 0.64 [0.32, 1.31]                   |

IVCAD, Efficacy of influenza vaccination in reducing cardiovascular events in patients with coronary artery diseases study<sup>18</sup>

**Figure S1. Cochrane quality assessment tool for assessment of risk of bias for the randomized controlled trials.**

| Studies                                            | Randomization | Allocation concealment | Blinding | Outcome assessment bias | Intention to treat | Loss to follow-up | Free of other biases |
|----------------------------------------------------|---------------|------------------------|----------|-------------------------|--------------------|-------------------|----------------------|
| FLUVACS <sup>17</sup>                              |               |                        |          |                         |                    |                   |                      |
| FLUCAD <sup>16</sup>                               |               |                        |          |                         |                    |                   |                      |
| IVCAD <sup>18</sup>                                |               |                        |          |                         |                    |                   |                      |
| Phrommintikul <i>et al.</i> <sup>19</sup>          |               |                        |          |                         |                    |                   |                      |
| Low risk=Green; Unclear risk=White; High risk= Red |               |                        |          |                         |                    |                   |                      |

FLUVACS, Flu vaccination in acute coronary syndromes and planned percutaneous coronary interventions study; FLUCAD, Influenza vaccination in secondary prevention from coronary ischemic events in coronary artery disease study; IVCAD, The efficacy of influenza vaccination in reducing cardiovascular events in patients with coronary artery diseases study.

**Figure S2. Effect of influenza vaccine on heart failure.**

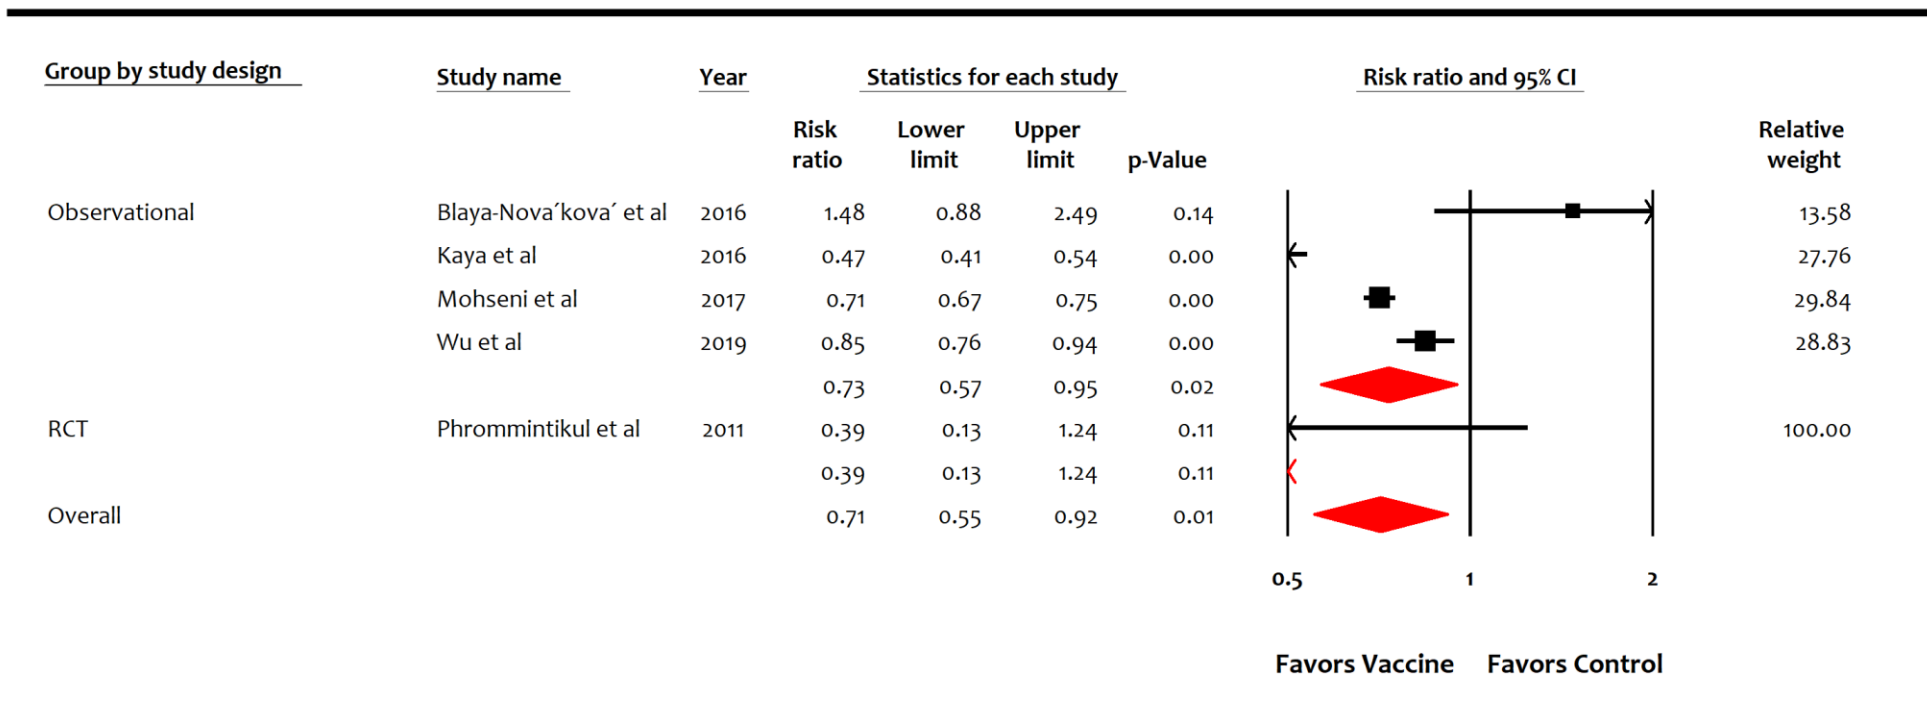

Studies included: Blaya-Novakova et al<sup>34</sup>, Kaya et al<sup>36</sup>, Mohseni et al<sup>37</sup>, Wu et al<sup>20</sup>, Phrommintikul et al<sup>19</sup>.
